# Supplementary figures and images for: Troxerutin down-regulates KIM-1, modulates p38 MAPK signaling, and enhances renal regenerative capacity in a rat model of gentamycin-induced acute kidney injury
Source: Royal Society of Chemistry journal article supplement (doi:10.1039/c8fo01086b), 2018-01-01

## Supplementary Fig 1

**A (N Ctrl)**

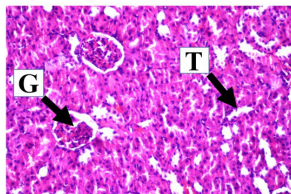

**B (Tr Ctrl)**

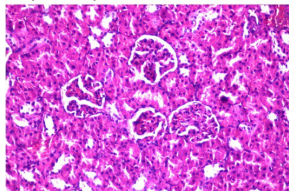

**C (Gn)**

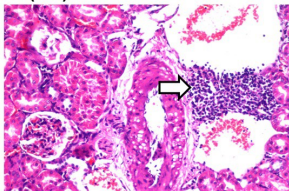

**D (Gn+Tr 50)**

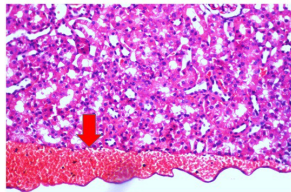

**E (Gn+Tr 100)**

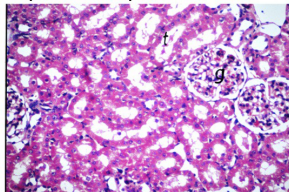

**F (Gn+Tr 150)**

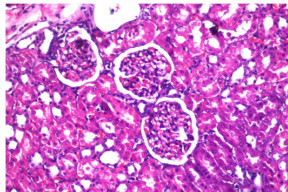

**G (Gn+Tr 200)**

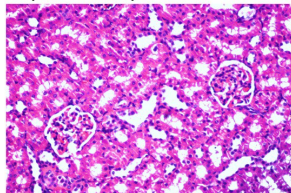

Supplement: c8fo01086b3.pdf [file c8fo01086b3.pdf]
